# Supplementary figures and images for: Electrode calibration with a microfluidic flow cell for fast-scan cyclic voltammetry
Source: Royal Society of Chemistry journal article supplement (doi:10.1039/c2lc40168a), 2012-01-01

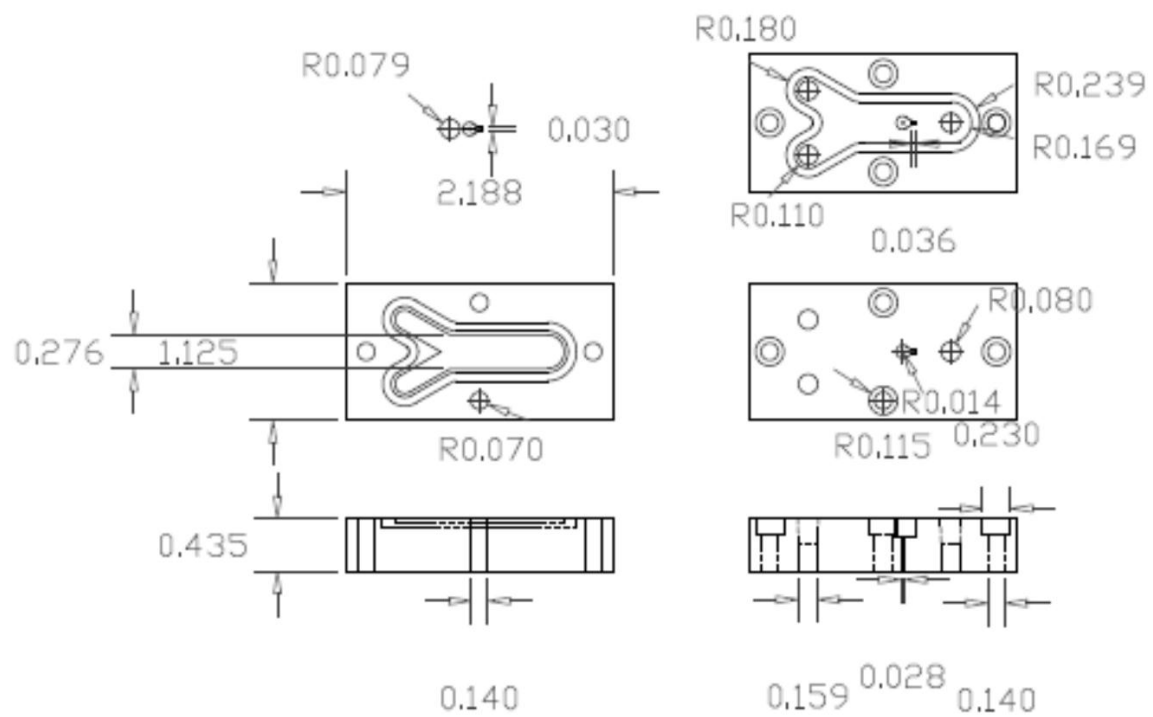

Microfluidic Flow Cell  
(units in inches)

Supplement: c2lc40168a.pdf [file c2lc40168a.pdf]
